# Supplementary material
Source: HighWire-hosted journal article supplement (https://jnm.snmjournals.org/highwire/filestream/93966/field_highwire_adjunct_files/0/jnm055608_Supp_Table.pdf)
Supplement: jnm055608_Supp_Table.pdf [file jnm055608_Supp_Table.pdf]

**Supplemental Table 1.** Biodistribution of <sup>86</sup>Y-labeled 19G9 antibody constructs 24 hours post-injection in male Nu/Nu mice implanted with subcutaneous LNCaP tumors. Results shown as percentage of initial dose recovered in each tissue (%ID/gram) and standard deviation (SD).

| Tissue          | IgG         | scFv           | diabody       | miniantibody |
|-----------------|-------------|----------------|---------------|--------------|
|                 | %ID/g (SD)  |                |               |              |
| Blood           | 15.8 (4.0)  | 0.039 (0.041)  | 0.134 (0.036) | 3.98 (0.94)  |
| Lung            | 6.58 (0.65) | 0.11 (0.02)    | 0.68 (0.12)   | 2.64 (0.45)  |
| Liver (all)     | 5.21 (0.99) | 0.57 (0.10)    | 4.70 (1.1)    | 11.0 (3.7)   |
| Spleen          | 5.86 (0.87) | 0.36 (0.07)    | 2.21 (0.61)   | 5.03 (0.83)  |
| Kidney          | 3.68 (0.68) | 11.8 (3.7)     | 51.4 (9.4)    | 11.1 (2.4)   |
| Muscle          | 2.19 (0.50) | 0.058 (0.018)  | 0.24 (0.08)   | 0.98 (0.31)  |
| Fat             | 2.70 (0.93) | 0.082 (0.039)  | 0.64 (0.45)   | 1.46 (0.28)  |
| Heart           | 4.22 (0.77) | 0.085 (0.013)  | 0.58 (0.12)   | 2.56 (0.54)  |
| Brain           | 0.59 (0.15) | 0.0005 (0.002) | 0.016 (0.005) | 0.14 (0.02)  |
| Bone            | 2.44 (0.60) | 0.20 (0.04)    | 1.00 (0.18)   | 2.13 (0.68)  |
| Testes          | 2.27 (0.28) | 0.077 (0.018)  | 0.49 (0.070)  | 1.71 (0.24)  |
| Prostate        | 2.91 (0.16) | 0.072 (0.025)  | 0.50 (0.44)   | 1.24 (0.56)  |
| Pancreas        | 1.73 (0.32) | 0.073 (0.022)  | 0.38 (0.10)   | 1.05 (0.25)  |
| Tumor           | 20.2 (2.0)  | 0.54 (0.13)    | 3.72 (0.76)   | 13.1 (3.6)   |
| Skin            | 4.57 (0.74) | 0.29 (0.067)   | 1.29 (0.53)   | 3.06 (0.67)  |
| Stomach         | 1.24 (0.50) | 0.15 (0.029)   | 0.47 (0.15)   | 0.95 (0.63)  |
| Intestine (all) | 1.87 (0.22) | 0.15 (0.021)   | 0.63 (0.064)  | 1.27 (0.83)  |
